# Supplementary material
Source: MDPI journal article supplement (https://www.mdpi.com/1424-8247/15/2/138)
Supplement: s1 [file s1]

# Supplementary Information

## **Dual-sensitive Gold-nanocubes platform with synergistic immunotherapy for inducing immune cycle using NIR-mediated PTT/NO/IDO**

Hsin-Yi Tsao<sup>1,†</sup>, Hung-Wei Cheng<sup>1,†</sup>, Chia-Chi Kuo<sup>1</sup>, and San-Yuan Chen<sup>1,2,3,4,\*</sup>

<sup>1</sup> Materials Science and Engineering, National Yang Ming Chiao Tung University, 300 Hsinchu, Taiwan

<sup>2</sup> Graduate Institute of Biomedical Science, China Medical University, 404 Taichung, Taiwan

<sup>3</sup> Frontier Research Centre on Fundamental and Applied Sciences of Matters National Tsing Hua University, 300 Hsinchu, Taiwan

<sup>4</sup> School of Dentistry, College of Dental Medicine Kaohsiung Medical University Kaohsiung, 807378, Taiwan

\* Correspondence: [sanyuanchen@nycu.edu.tw](mailto:sanyuanchen@nycu.edu.tw)

† These first authors contributed equally to this work.

(a)

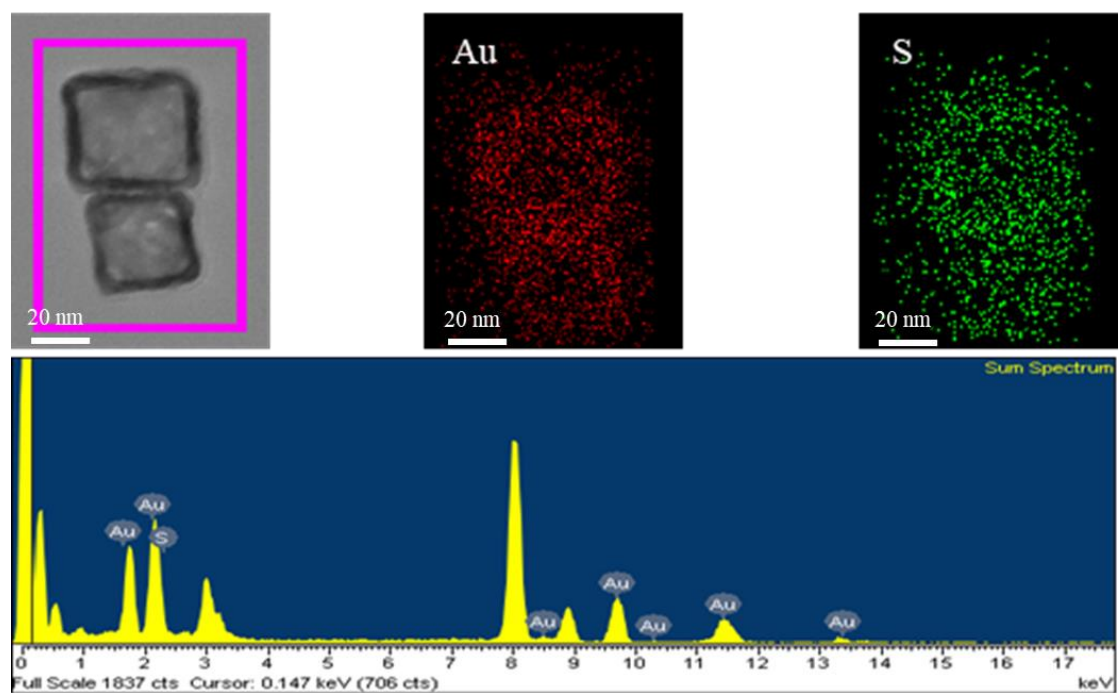

(b)

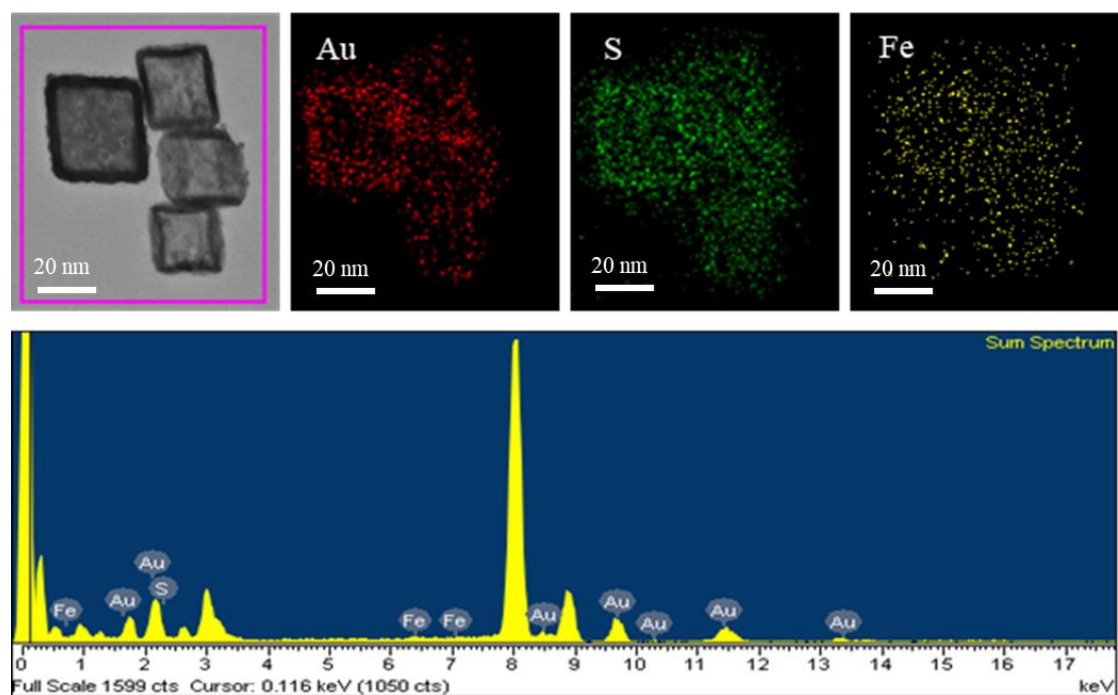

**Figure S1.** Elemental analysis. (a) GAP and (b) GAPFBD.

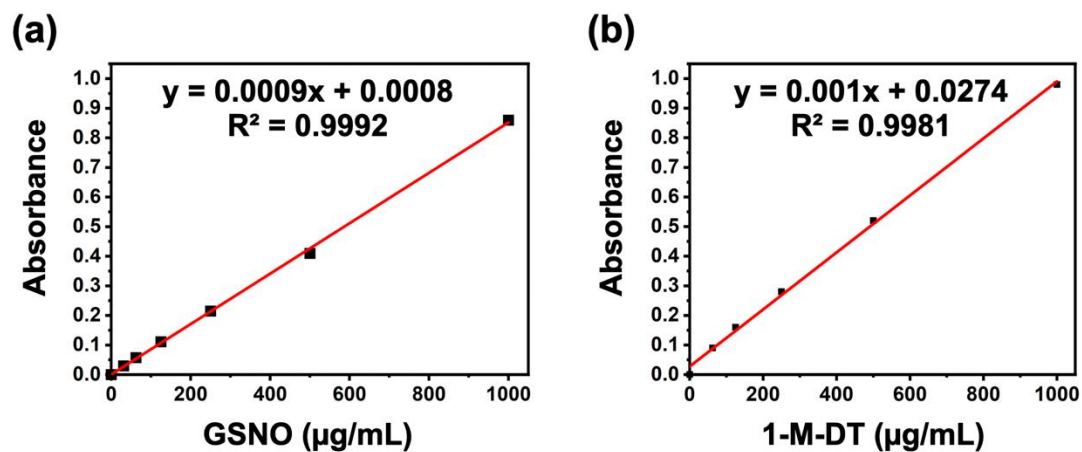

**Figure S2.** Standard curve of (a) GSNO and (b) 1-M-DT.

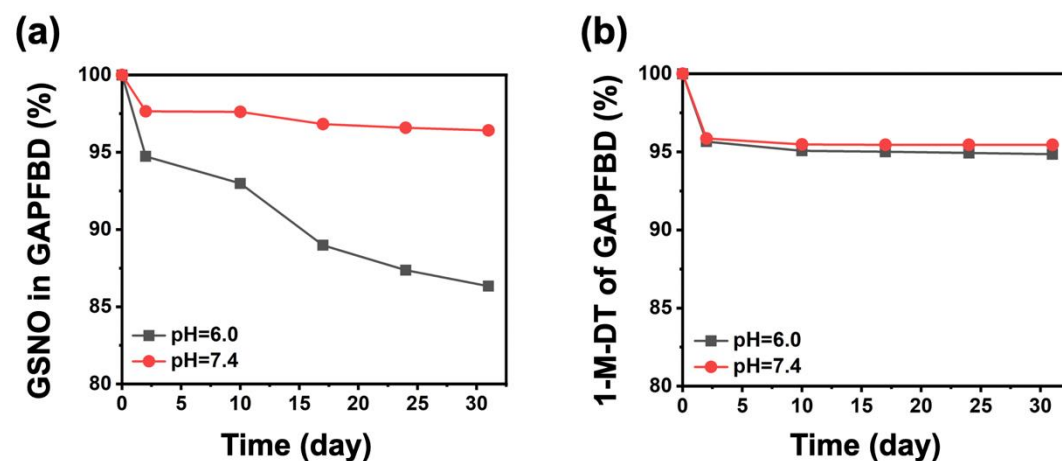

**Figure S3.** (a) GSNO and (b) 1-M-DT stability of GAPFBD under storage condition of pH=7.4 and pH=6.0.

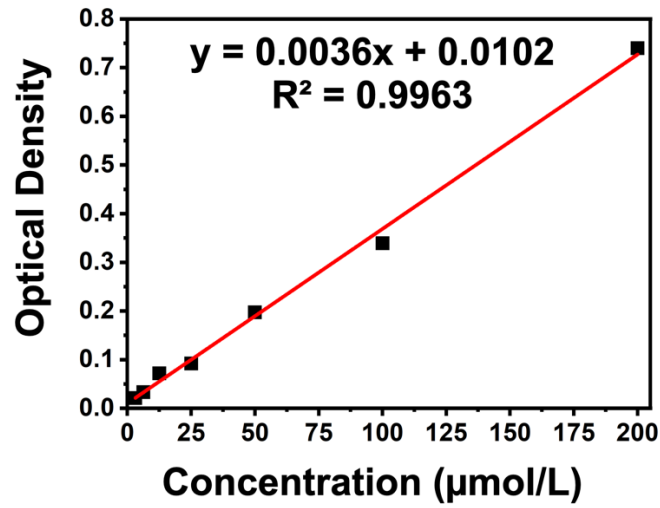

**Figure S4.** Standard curve of nitrite concentration.

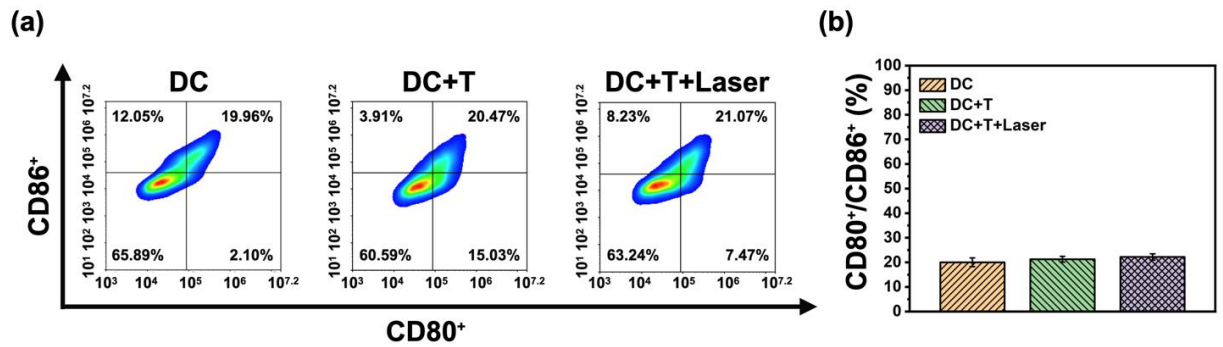

**Figure S5.** Analysis of immune responses induced by PTT/NO/IDO therapeutic nanoparticle. (a) Flow cytometry expression of CD80<sup>+</sup> and CD86<sup>+</sup> on mature DCs surface. (b) Quantitative results. Data are expressed as mean ± SD, n=3.

**Table S1.** Element analysis of the GAPFBD.

| <b>Element</b> | <b>Atomic%</b> |
|----------------|----------------|
| S              | 9.14           |
| Fe             | 5.48           |
| Au             | 85.38          |
| Totals         | 100            |
